# Supplementary material for: The Influence of Increased Dairy Product Consumption, as Part of a Lifestyle Modification Intervention, on Diet Quality and Eating Patterns in Female Adolescents with Overweight/Obesity
Source: MDPI journal article supplement (doi:10.3390/children9111703), 2022-11-06
Supplement: s1 [file s1]

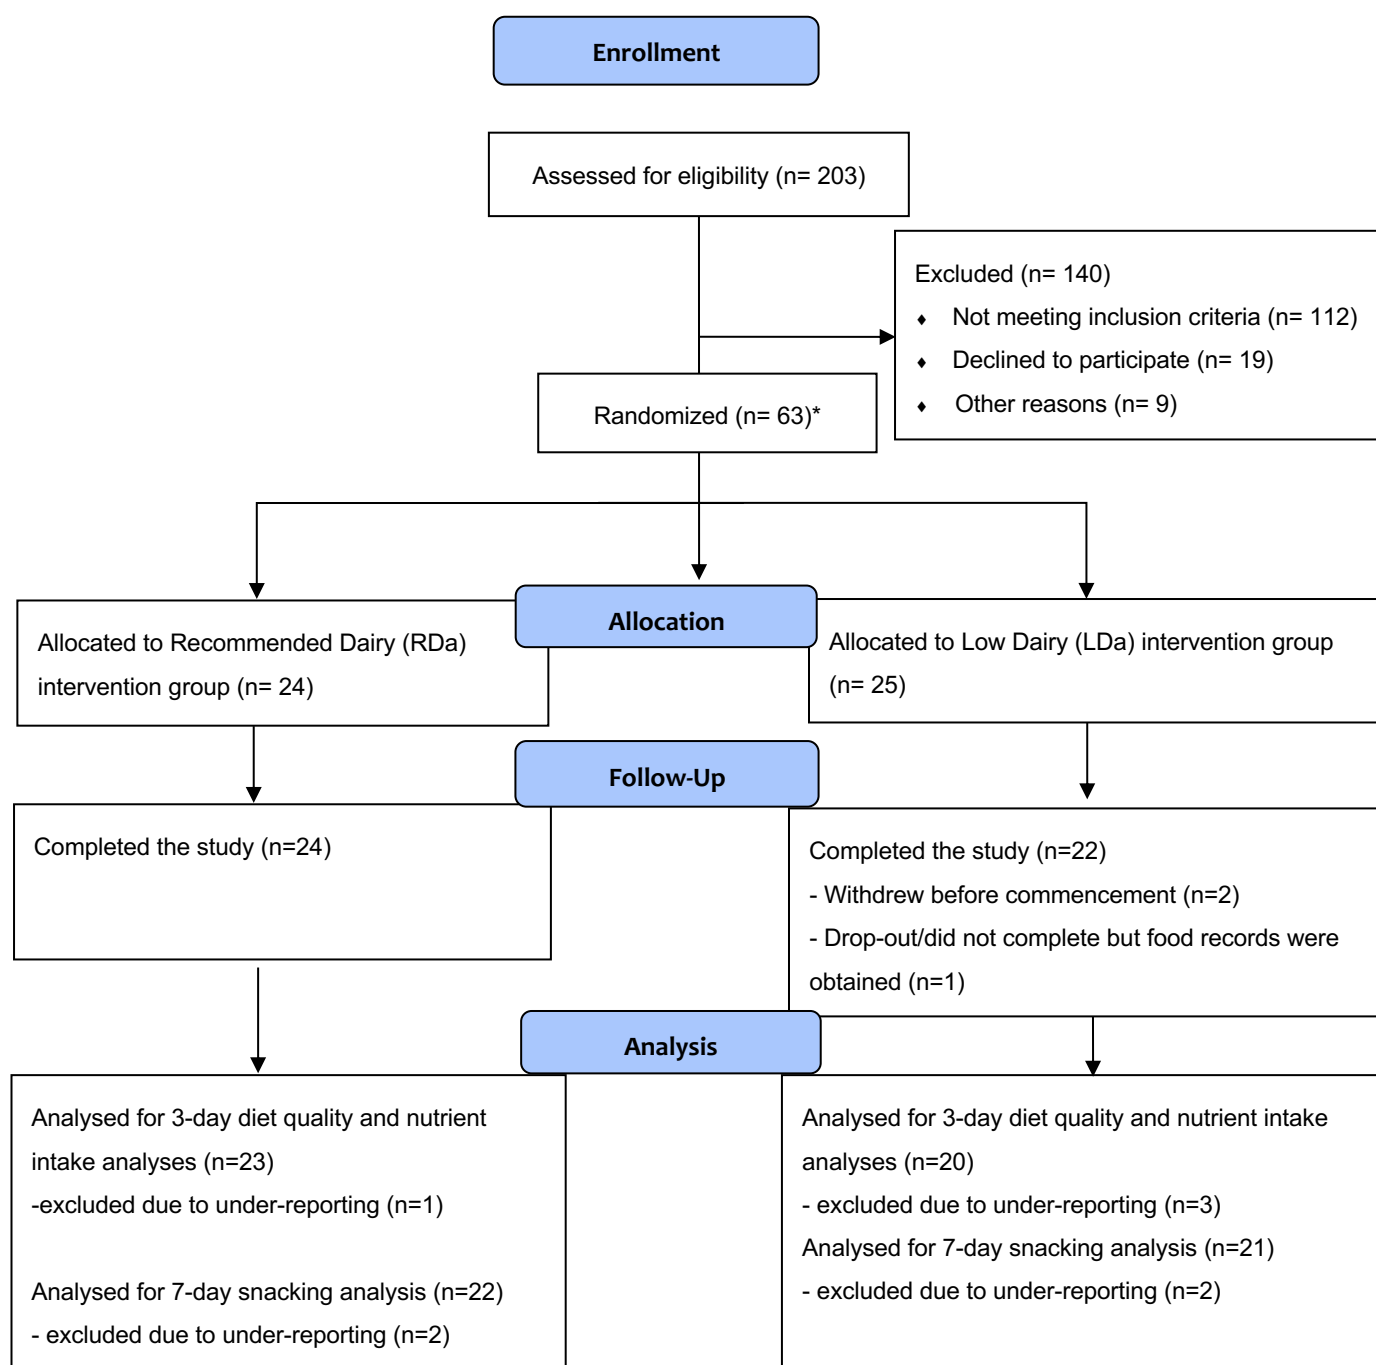

**Supplementary Figure S1: Consort Flow Diagram.**

\*The remaining participants were allocated to a no-intervention control group not reported in this study.
